# Supplementary material for: Safety, activity, and molecular heterogeneity following neoadjuvant non-pegylated liposomal doxorubicin, paclitaxel, trastuzumab, and pertuzumab in HER2-positive breast cancer (Opti-HER HEART): an open-label, single-group, multicenter, phase 2 trial
Source: PubMed Central journal article supplement (PMC6325829; doi:10.1186/s12916-018-1233-1), 2019-01-09
Supplement: 12916_2018_1233_MOESM6_ESM.pdf [file 12916_2018_1233_MOESM6_ESM.pdf]

**Table S2 - Rates of pathological complete response (pCR) reported across 15 published neoadjuvant clinical trials in HER2-positive breast cancer.**

| Study Name               | Type of Treatment | All Patients |     | RH+       |     | RH-negative |     | Type of pCR   |
|--------------------------|-------------------|--------------|-----|-----------|-----|-------------|-----|---------------|
|                          |                   | N            | pCR | N         | pCR | N           | pCR |               |
| CHERLOB                  | A/T+H             | 36           | 25% | 21        | 24% | 15          | 27% | Breast+Axilla |
| GEPARQUINTO              | A/T+H             | 307          | 30% | NA        | NA  | NA          | NA  | Breast+Axilla |
| NSABP-B41                | A/T+H             | 176          | 49% | 121       | 46% | 55          | 58% | Breast+Axilla |
| GEPARSIXTO               | A/T+H             | 273          | 51% | NA        | NA  | NA          | NA  | Breast+Axilla |
| GEPARQUATTRO/NOAH/TECHNO | A/T+H             | 749          | 40% | 385       | 31% | 364         | 50% | Breast+Axilla |
| NSABP-B41                | A/T+H+L           | 171          | 60% | 108       | 55% | 63          | 70% | Breast+Axilla |
| CHERLOB                  | A/T+H+L           | 45           | 47% | 28        | 36% | 17          | 59% | Breast+Axilla |
| TRYPHAENA                | A/T+H+P           | 225          | 62% | 114       | 48% | 111         | 76% | Breast+Axilla |
| OPTI-HER                 | A/T+H+P           | 83           | 57% | 57        | 47% | 26          | 77% | Breast+Axilla |
| BERENICE                 | A/T+H+P           | 400          | 62% | 252       | 54% | 140         | 74% | Breast+Axilla |
| PAMELA                   | H+L               | 151          | 31% | 77        | 18% | 74          | 43% | Breast        |
| TBCRC006                 | H+L               | 64           | 27% | 39        | 21% | 25          | 36% | Breast        |
| NeoALTTO                 | T+H               | 149          | 30% | 75        | 23% | 74          | 37% | Breast        |
| NeoSphere                | T+H               | 107          | 29% | 50        | 20% | 57          | 37% | Breast        |
| CALGB40601               | T+H               | 118          | 46% | 70        | 41% | 48          | 54% | Breast        |
| NeoALTTO                 | T+H+L             | 152          | 51% | 77        | 42% | 75          | 61% | Breast        |
| CALGB40601               | T+H+L             | 117          | 56% | 69        | 41% | 48          | 79% | Breast        |
| NeoSphere                | T+H+P             | 107          | 46% | 50        | 26% | 57          | 63% | Breast        |
|                          |                   | All Patients |     | nonHER2-E |     | HER2-E      |     | Type of pCR   |
|                          |                   | N            | pCR | N         | pCR | N           | pCR |               |
| PAMELA                   | H+L               | 151          | 30% | 50        | 10% | 101         | 41% | Breast        |
| CALGB40601               | T+H/L/LH          | 265          | 42% | 183       | 31% | 82          | 66% | Breast+Axilla |
| NOAH                     | T+H               | 63           | 44% | 29        | 34% | 34          | 53% | Breast+Axilla |
| NEOALTTO                 | T+H/L/LH          | 254          | 35% | 144       | 22% | 110         | 52% | Breast        |
| OPTI-HER                 | A/T+H+P           | 58           | 57% | 28        | 47% | 30          | 83% | Breast+Axilla |
| CHERLOB                  | A/T+H/L/LH        | 69           | 28% | 47        | 17% | 22          | 50% | Breast+Axilla |
| BERENICE                 | A/T+H+P           | 400          | 62% | 119       | 46% | 172         | 74% | Breast+Axilla |

T, taxane; L, lapatinib; H, Herceptin (trastuzumab); A/T, anthracycline/taxane-based.
