# Supplementary material for: Safety, activity, and molecular heterogeneity following neoadjuvant non-pegylated liposomal doxorubicin, paclitaxel, trastuzumab, and pertuzumab in HER2-positive breast cancer (Opti-HER HEART): an open-label, single-group, multicenter, phase 2 trial
Source: Springer Nature journal article supplement (doi:10.1186/s12916-018-1233-1), 2019-01-08

Figure S1 - Protocol-specified cardiac toxicity algorithm

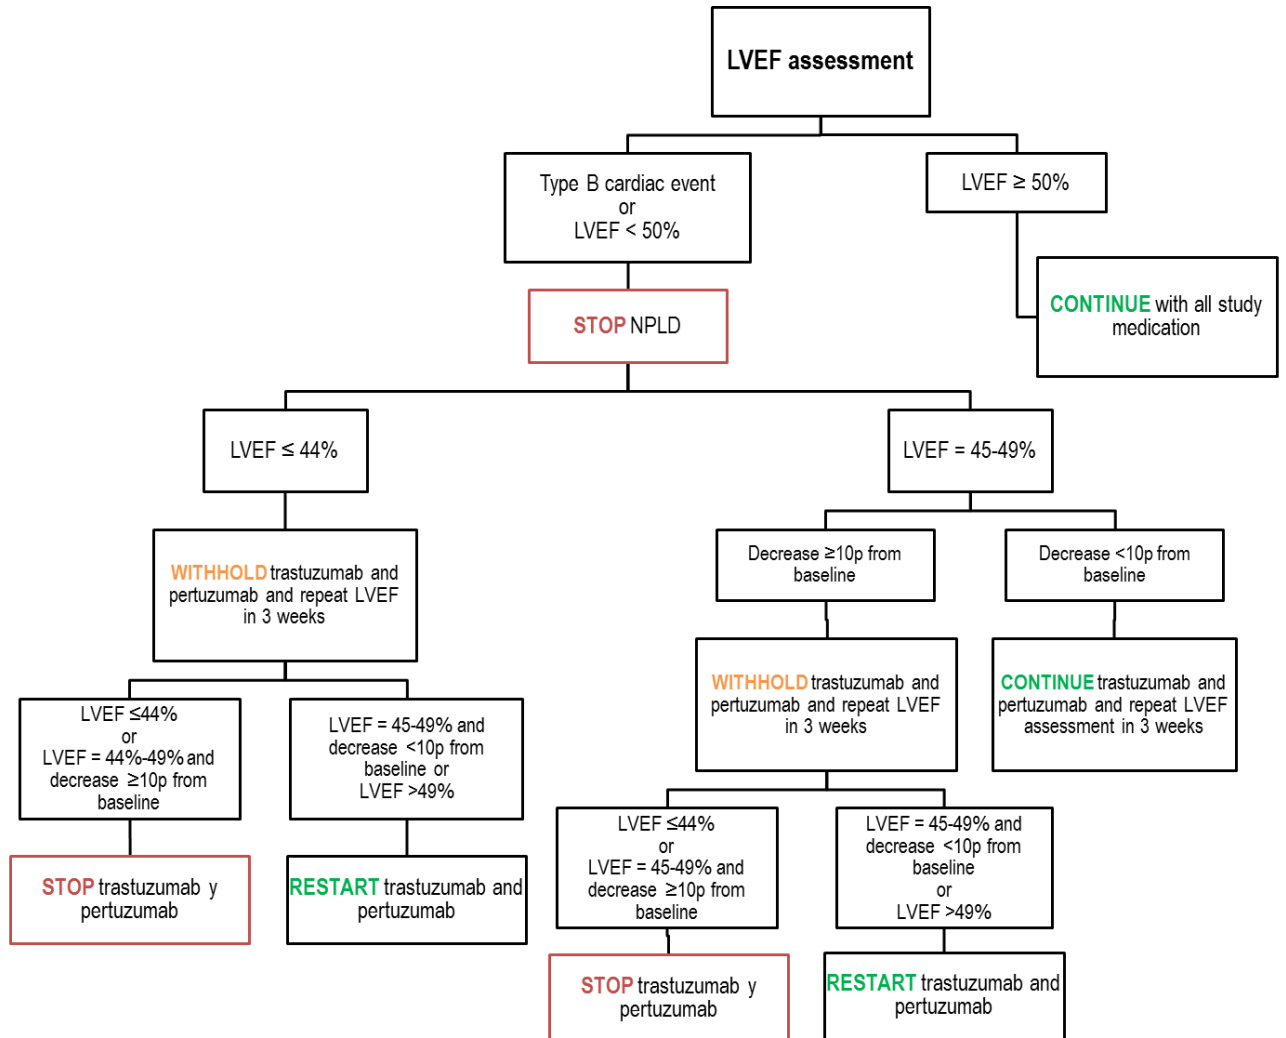

Supplement: MOESM2 [file 16388056]
