# Supplementary material for: Safety, activity, and molecular heterogeneity following neoadjuvant non-pegylated liposomal doxorubicin, paclitaxel, trastuzumab, and pertuzumab in HER2-positive breast cancer (Opti-HER HEART): an open-label, single-group, multicenter, phase 2 trial
Source: Springer Nature journal article supplement (doi:10.1186/s12916-018-1233-1), 2019-01-08
Supplement: MOESM3 [file 16388056]

Table S1 – Overall study population and biomarker population characteristics.

|                                        | All Patients |        | Patient with tumor samples |        |
|----------------------------------------|--------------|--------|----------------------------|--------|
|                                        | N            | %      | N                          | %      |
|                                        | 83           | -      | 58                         | -      |
| <b>Age, median (range)</b>             | 49 (22-78)   |        | 49 (22-74)                 |        |
| <b>Tumor size (mm), median (range)</b> | 30 (10-80)   |        | 30 (10-80)                 |        |
| <b>Clinical nodal status</b>           |              |        |                            |        |
| N0                                     | 40           | 48.2 % | 23                         | 39.6%  |
| N1                                     | 30           | 36.1 % | 23                         | 39.6%  |
| N2                                     | 8            | 9.6 %  | 8                          | 13.8%  |
| N3                                     | 1            | 1.2 %  | 1                          | 1.7%   |
| Nx                                     | 4            | 4.9 %  | 3                          | 5.1 %  |
| <b>Hormone receptor (HR) status</b>    |              |        |                            |        |
| Negative                               | 26           | 31.3 % | 18                         | 31.1 % |
| Positive                               | 57           | 68.7 % | 40                         | 68.9 % |
| <b>Menopausal status</b>               |              |        |                            |        |
| Pre-menopausal                         | 54           | 65.1 % | 39                         | 67.2 % |
| Post-menopausal                        | 29           | 34.9 % | 19                         | 32.7 % |
| <b>Tumor stage</b>                     |              |        |                            |        |
| II                                     | 65           | 78.3 % | 44                         | 75.9 % |
| III                                    | 18           | 21.7 % | 14                         | 24.1%  |
| <b>Histologic grade</b>                |              |        |                            |        |
| 1                                      | 5            | 6.0 %  | 3                          | 5.1 %  |
| 2                                      | 28           | 33.7 % | 15                         | 28.8 % |
| 3                                      | 32           | 38.6 % | 27                         | 46.5 % |
| Unknown                                | 18           | 21.7 % | 13                         | 22.4 % |
