# Supplementary material for: Safety, activity, and molecular heterogeneity following neoadjuvant non-pegylated liposomal doxorubicin, paclitaxel, trastuzumab, and pertuzumab in HER2-positive breast cancer (Opti-HER HEART): an open-label, single-group, multicenter, phase 2 trial
Source: Springer Nature journal article supplement (doi:10.1186/s12916-018-1233-1), 2019-01-08
Supplement: MOESM5 [file 16388056]

**Figure S3 - Effect of 14 single genes on pCR adjusting for clinicopathological parameters.**

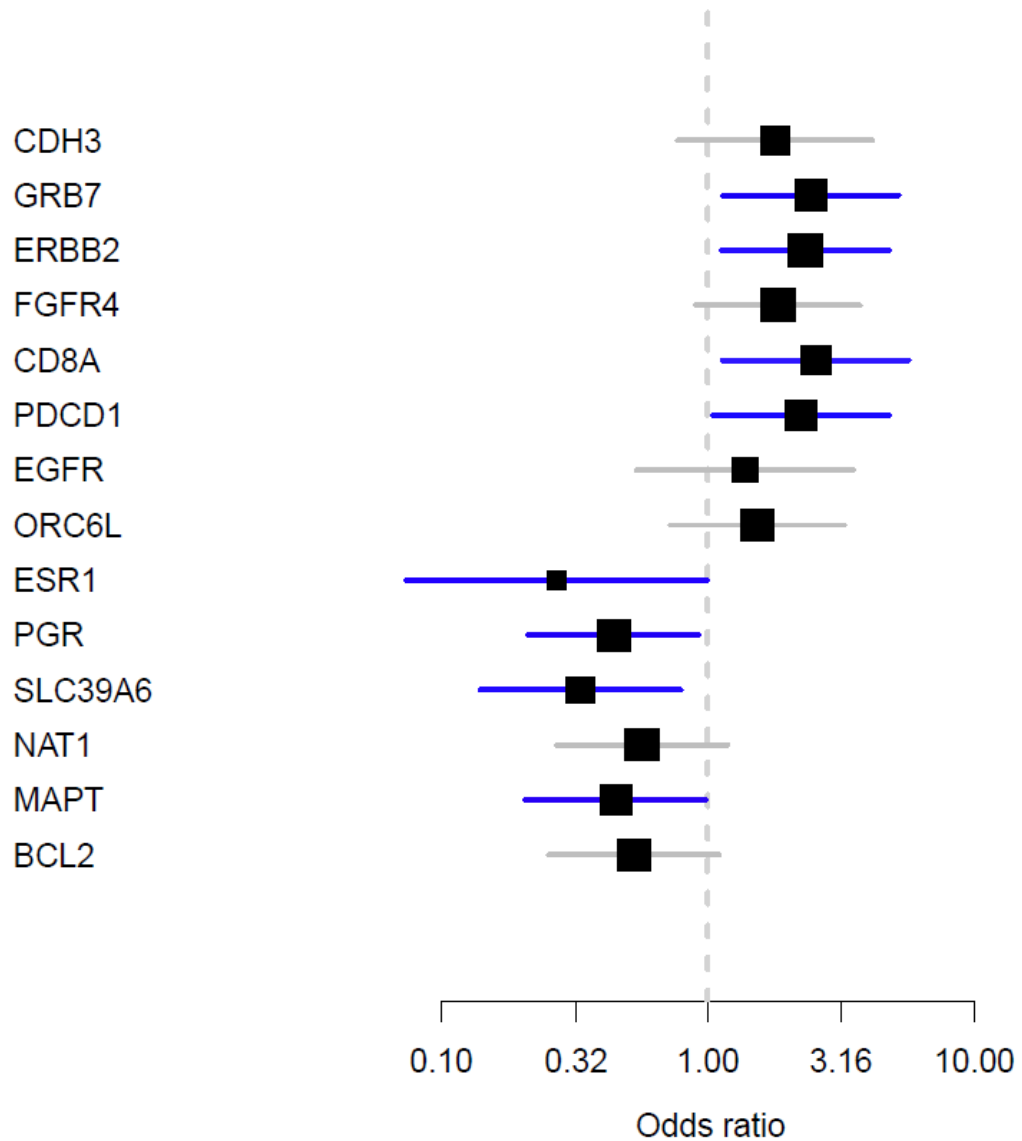

A false discovery rate  $< 0.01$  is considered significant. Each gene has been standardized to have a mean of 0 and a standard deviation of 1. Square indicate odds ratio (OR), and error bars, 95% confidence interval (CI). Square size is inversely proportional to the size of the CI.
